# Supplementary material for: Systematic study of ionic conduction in silver iodide/mesoporous alumina composites 2: effects of silver bromide doping
Source: Royal Society of Chemistry journal article supplement (doi:10.1039/d4cp00744a), 2024-01-01
Supplement: d4cp00744a1.pdf [file d4cp00744a1.pdf]

*Electronic Supplementary Information (ESI)*

**Systematic study of ionic conduction in silver iodide /  
mesoporous alumina composites 2: Effect of silver  
bromide doping**

*Yoko Fukui,<sup>\*a</sup> Yukihiro Yoshida,<sup>\*b</sup> Hiroshi Kitagawa<sup>b</sup> and Yohei Jikihara<sup>a</sup>*

<sup>a</sup> NBC Meshtec Inc., 2-50-3 Toyoda, Hino, Tokyo 191-0053, Japan

<sup>b</sup> Division of Chemistry, Graduate School of Science, Kyoto University, Kitashirakawa-Oiwakecho, Sakyo-ku, Kyoto 606-8502, Japan

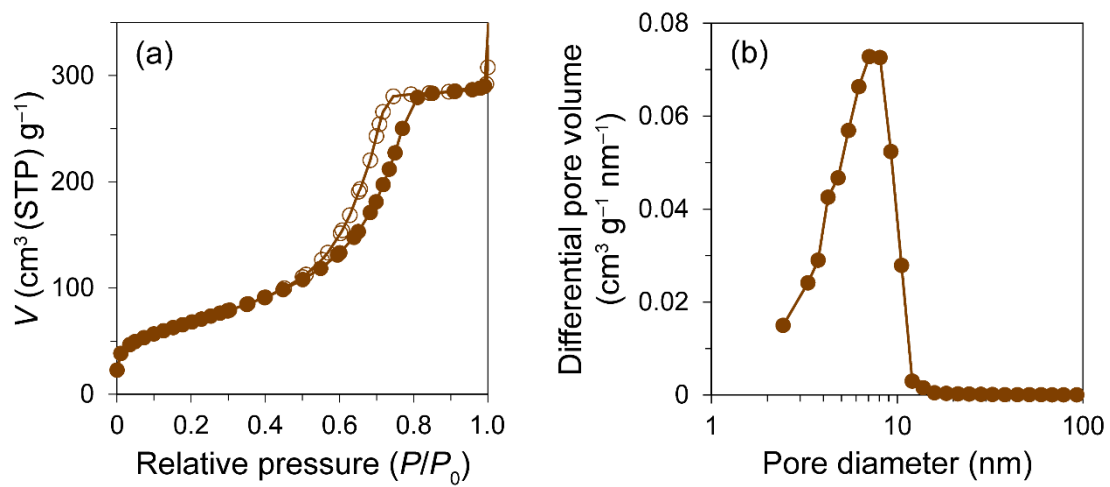

**Fig. S1** (a)  $N_2$  gas adsorption (closed circles) and desorption (open circles) isotherms of MPA at 77 K. (b) Pore size distribution of MPA obtained by applying the BJH method.

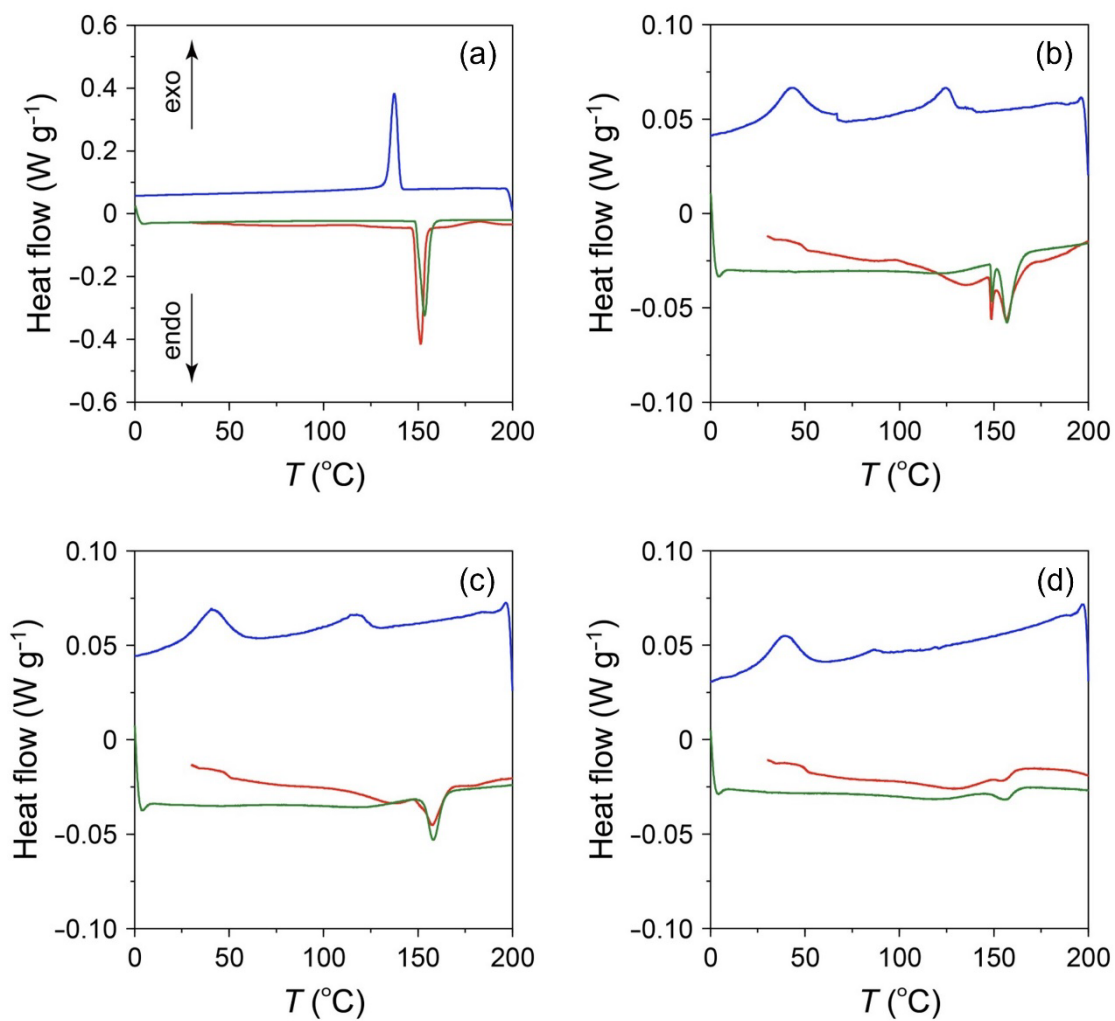

**Fig. S2** DSC profiles of **Br0** before heat treatment (a) and after heat treatment at (b) 400  $^{\circ}\text{C}$ , (c) 500  $^{\circ}\text{C}$ , and (d) 600  $^{\circ}\text{C}$  (red: 1st heating process, blue: 1st cooling process, green: 2nd heating process) (see Y. Fukui *et al.*, *Phys. Chem. Chem. Phys.* 2023, **25**, 25594–25602).

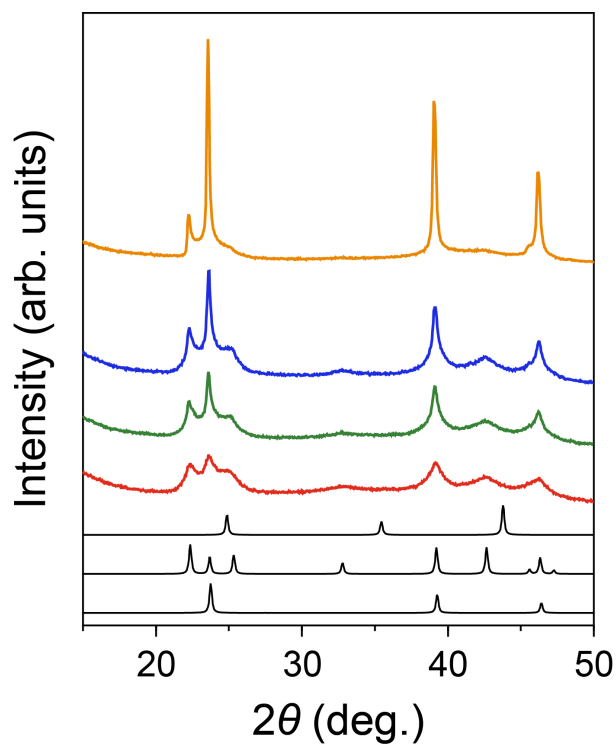

**Fig. S3** PXRd patterns of **Br0** (orange: before heat treatment, blue: heat treatment at 400 °C, green: heat treatment at 500 °C, red: heat treatment at 600 °C) along with simulated patterns (black thin lines) of  $\alpha$ -,  $\beta$ -, and  $\gamma$ -AgI (from the top) (see Y. Fukui *et al.*, *Phys. Chem. Chem. Phys.* 2023, **25**, 25594–25602).

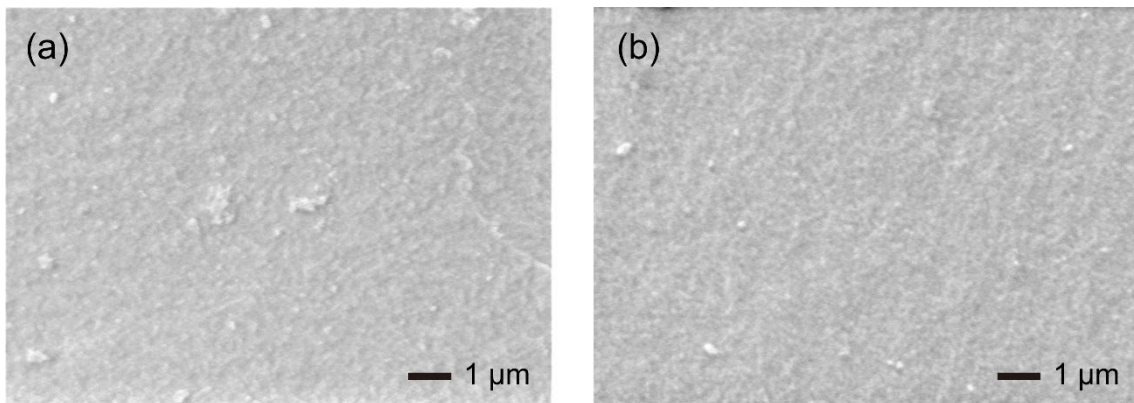

**Fig. S4** SEM images of **Br10** (a) before and (b) after heat treatment at 600 °C for 20 h.

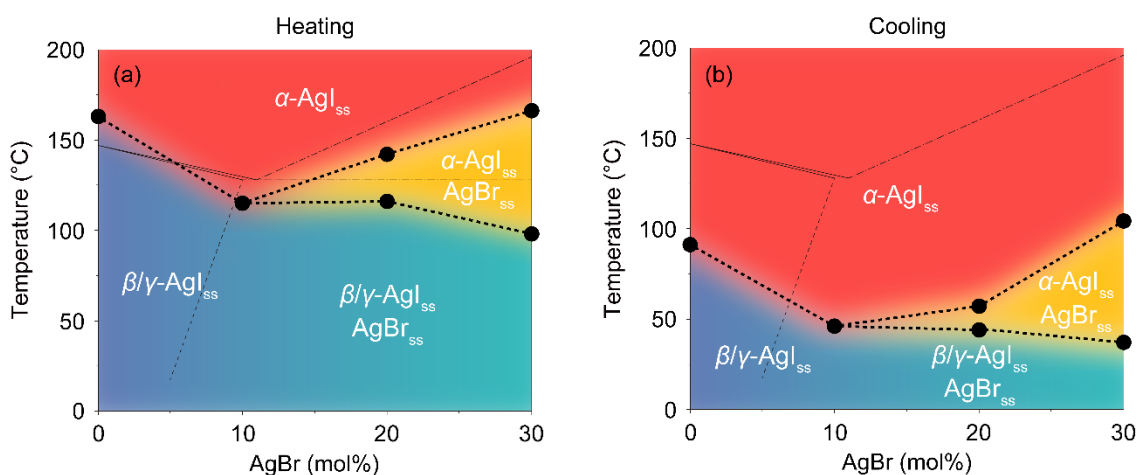

**Fig. S5** Phase diagram of AgI-AgBr/MPA system (blue:  $\beta/\gamma\text{-AgI}_{ss}$ , green:  $\beta/\gamma\text{-AgI}_{ss} + \text{AgBr}_{ss}$ , yellow:  $\alpha\text{-AgI}_{ss} + \text{AgBr}_{ss}$ , red:  $\alpha\text{-AgI}_{ss}$ ). The phase boundaries indicated by black dotted lines were defined when the molar ratio of  $\beta/\gamma\text{-AgI}_{ss}$  or  $\text{AgBr}_{ss}$  phase reaches 50% relative to that at 30 °C in (a) heating and (b) cooling processes (black circles). The ratios were determined by the Rietveld analysis of the variable-temperature PXRD patterns. The thin black lines represent the phase diagram of bulk AgI-AgBr system (H. Takahashi *et al.*, *Solid State Ionics*, 1984, **14**, 107–112).

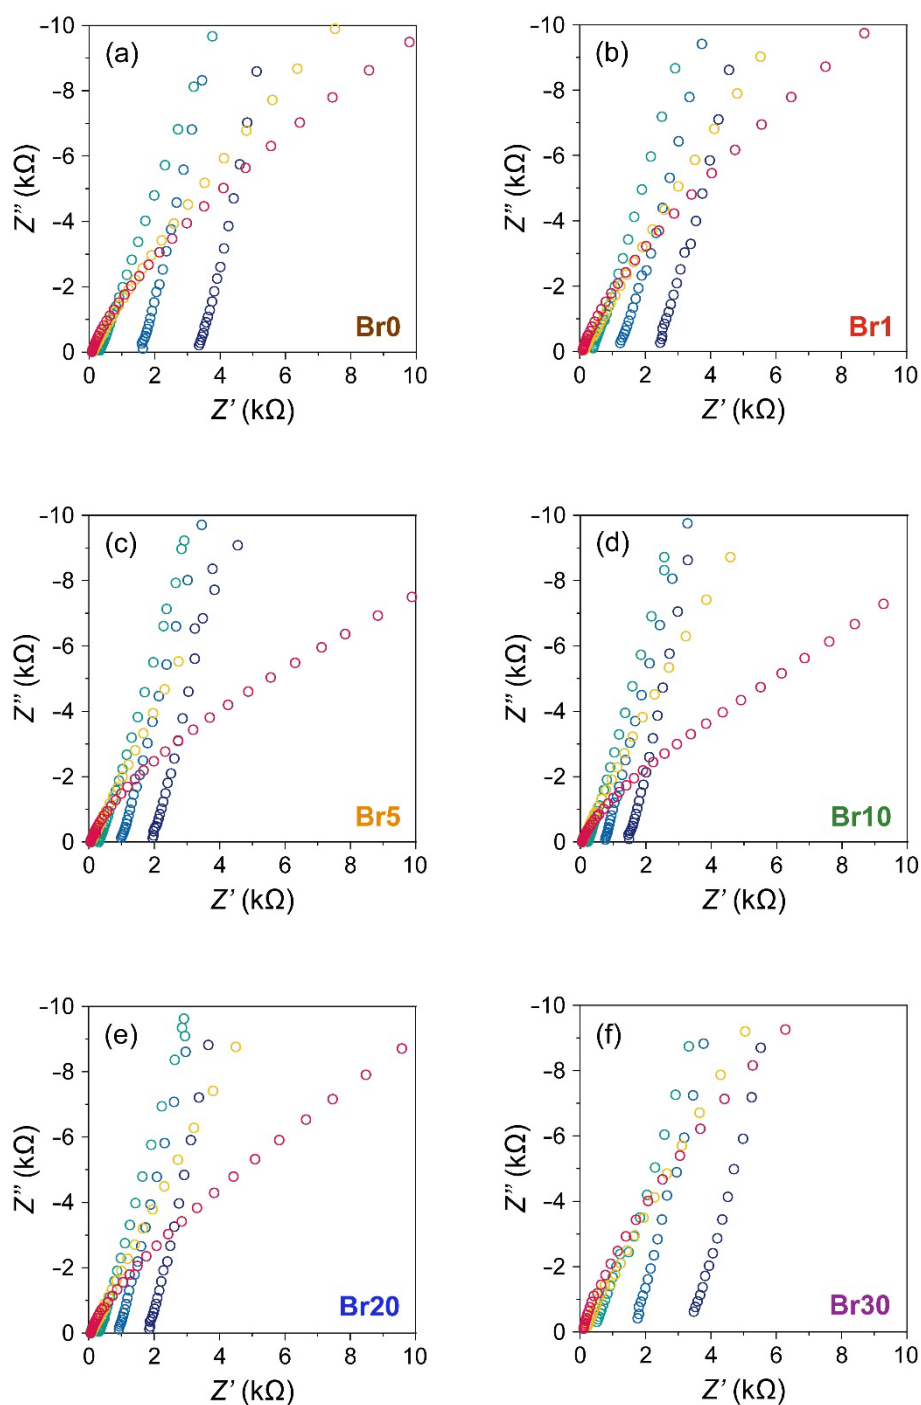

**Fig. S6** Temperature dependence of Nyquist plots of AgI-AgBr/MPA composites with various AgI:AgBr molar ratios ((a) **Br0**, (b) **Br1**, (c) **Br5**, (d) **Br10**, (e) **Br20**, and (f) **Br30**) at 25 °C (deep blue), 50 °C (light blue), 100 °C (green), 150 °C (yellow), and 200 °C (red) in the heating process.

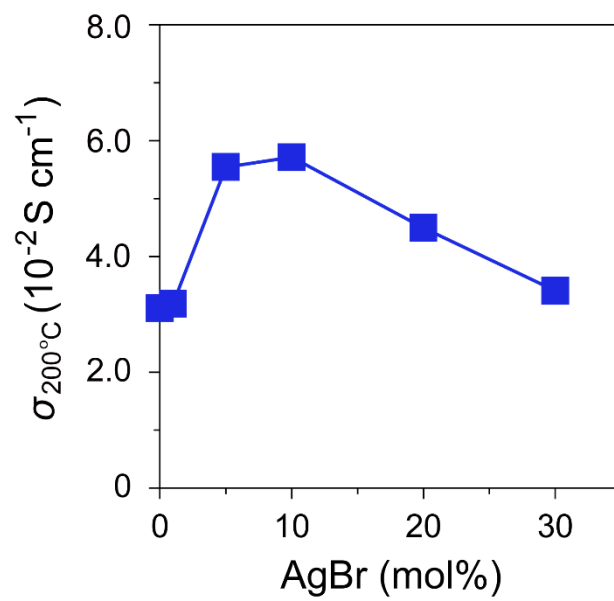

**Fig. S7** Plots of  $\sigma_{200^{\circ}\text{C}}$  against AgBr-doping ratio for AgI-AgBr/MPA composites.



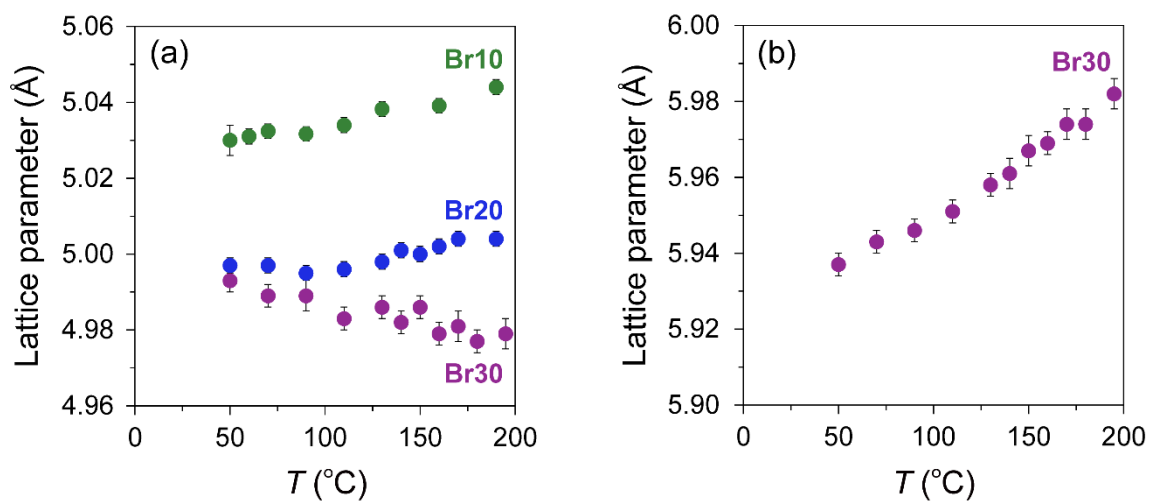

**Fig. S8** Temperature dependence of the lattice parameters of (a) cubic  $\alpha$ -AgI<sub>ss</sub> phase in **Br10** (green), **Br20** (blue), and **Br30** (purple) and (b) cubic AgBr<sub>ss</sub> phase in **Br30** determined by the Rietveld analysis of the variable-temperature PXRD patterns in the cooling process.

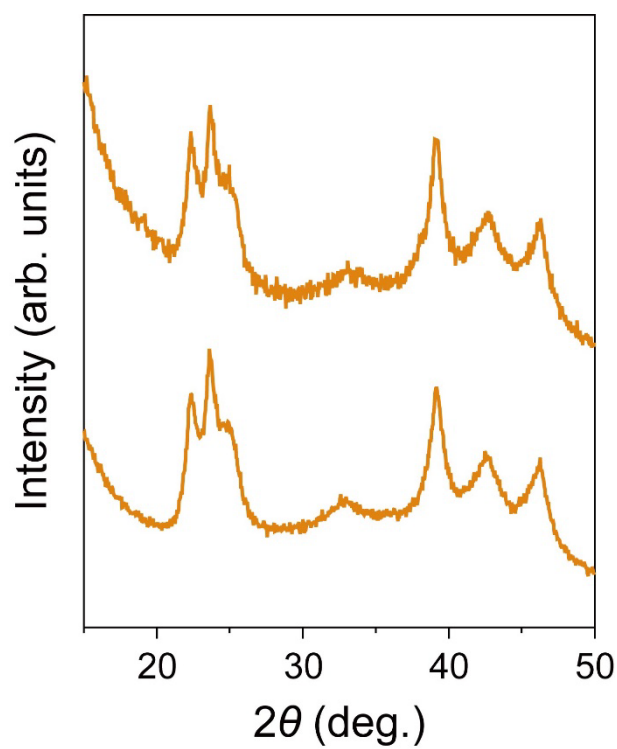

**Fig. S9** PXRd patterns of **Br0** before (bottom) and after (top) the electrochemical impedance spectroscopy measurements (25–200 °C) (see Y. Fukui *et al.*, *Phys. Chem. Chem. Phys.* 2023, **25**, 25594–25602).

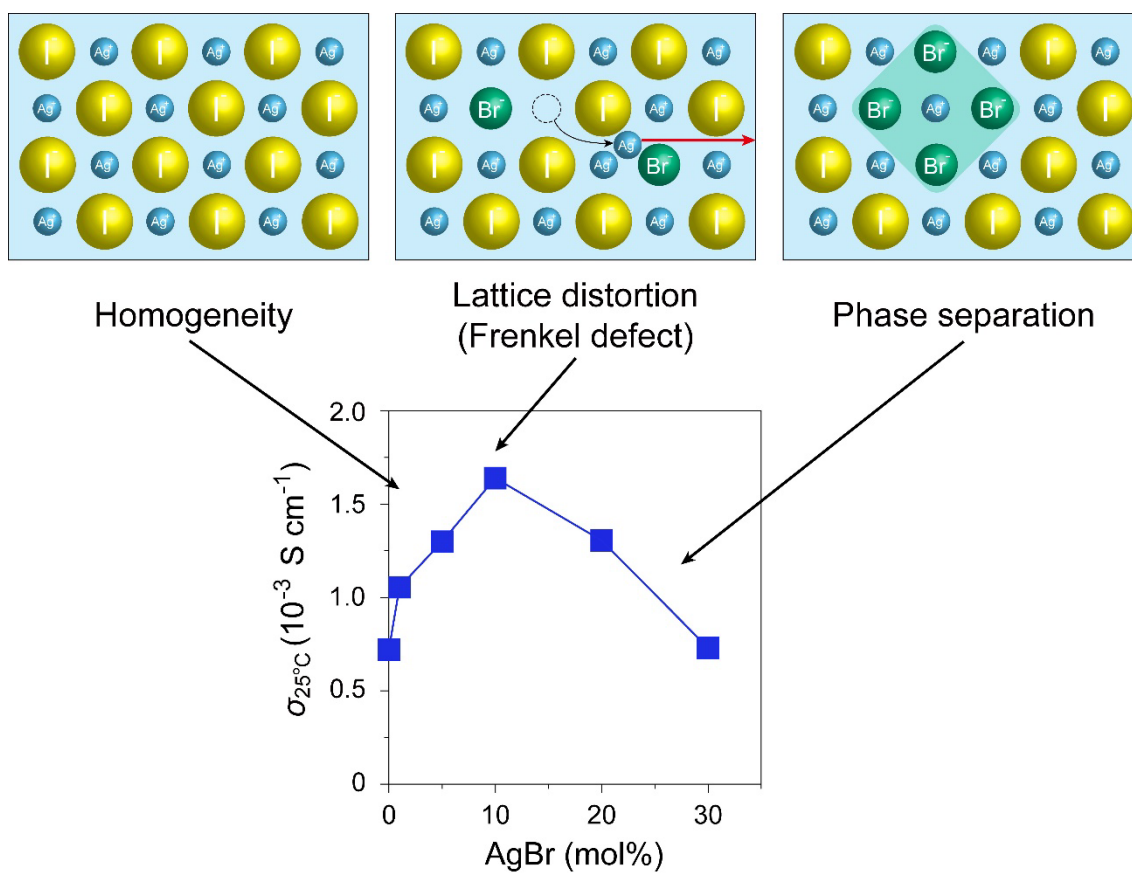

**Fig. S10** Schematic illustrations to explain the Ag<sup>+</sup>-ion conducting behaviour of AgI-AgBr/MPA composites by varying the AgBr content.

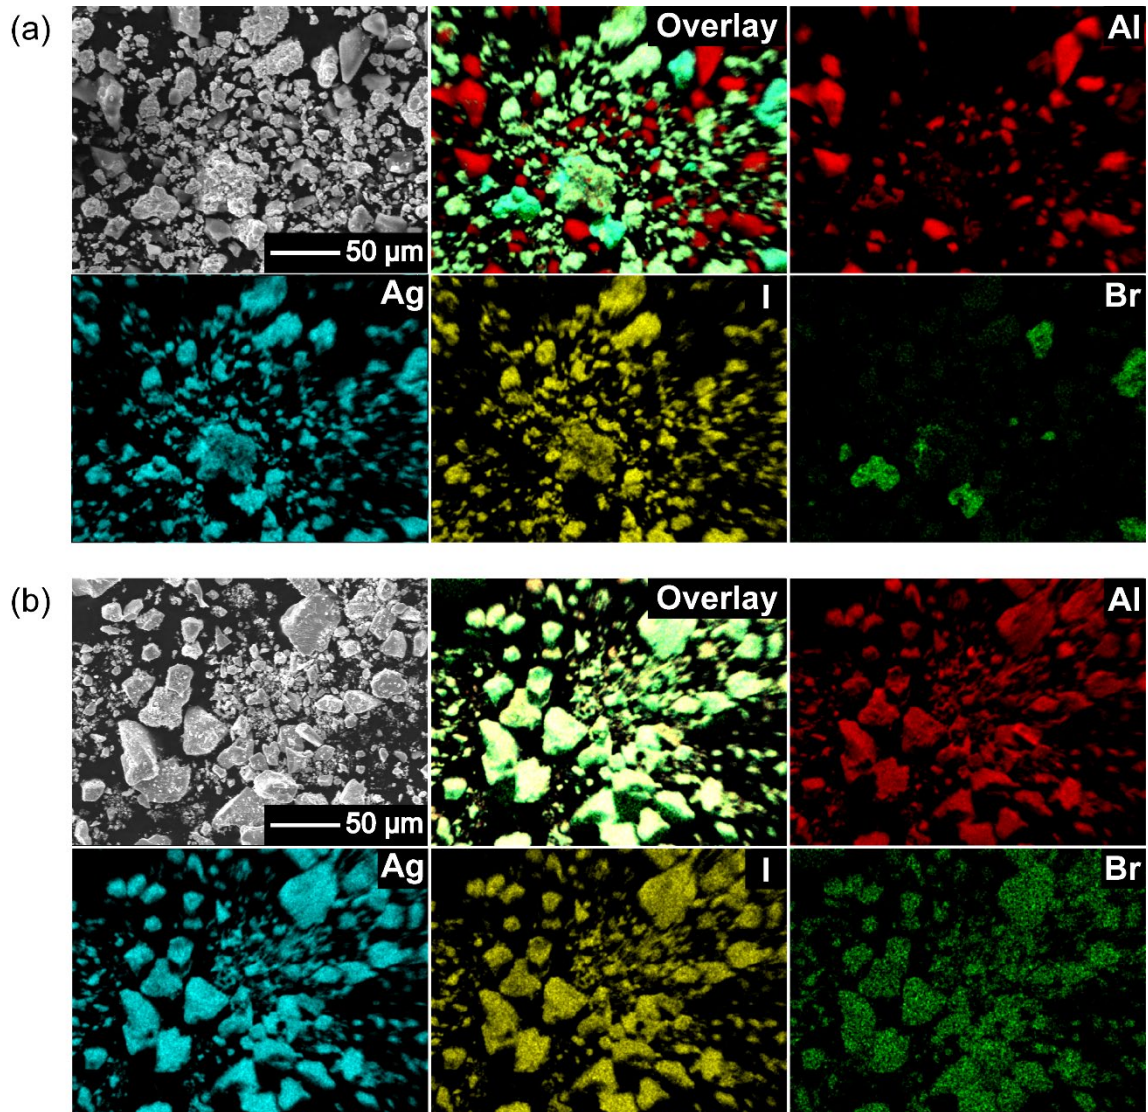

**Fig. S11** SEM images and EDS mappings (Overlay, Al, Ag, I, and Br) of **Br<sub>20</sub>** (a) before and (b) after heat treatment at 600 °C for 20 h.

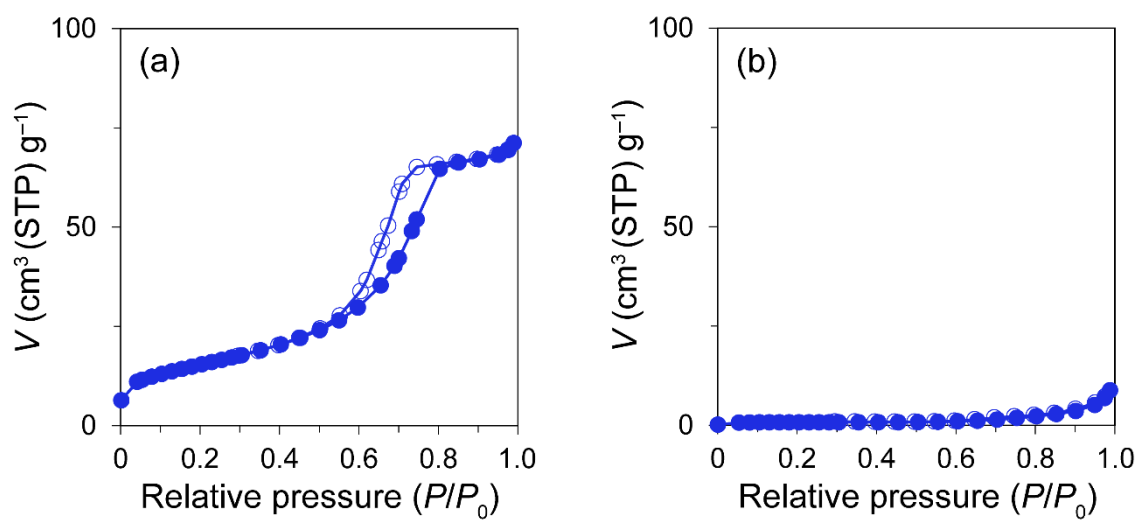

**Fig. S12**  $N_2$  gas adsorption (closed circles) and desorption (open circles) isotherms of **Br20** (a) before and (b) after heat treatment at 600 °C for 20 h.

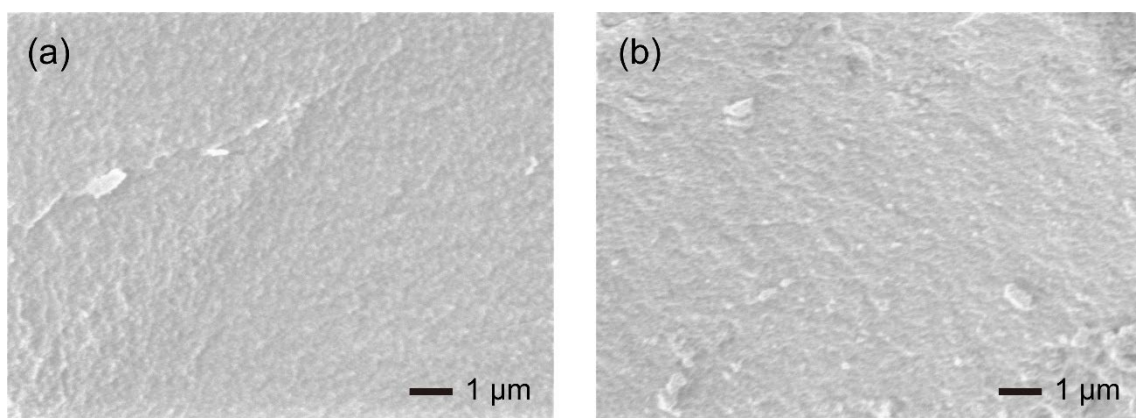

**Fig. S13** SEM images of **Br20** (a) before and (b) after heat treatment at 600 °C for 20 h.
